# Supplementary material
Source: MDPI journal article supplement (https://www.mdpi.com/1424-2818/13/8/397)
Supplement: s1 [file s1]

**Table S1** Summary statistics of RAD-seq data processed for each of 97 *Prunus mongolica* individuals.

| Sample ID | Clean reads (M) | GC (%) | Q30 (%) | Mapping rate (%) |
|-----------|-----------------|--------|---------|------------------|
| P1-1      | 11.01           | 37.59  | 90.49   | 91.41            |
| P1-2      | 11.97           | 37.59  | 91      | 90.02            |
| P1-3      | 12.07           | 37.69  | 91.88   | 88.97            |
| P1-4      | 10.38           | 37.77  | 91.88   | 91.29            |
| P1-5      | 8.23            | 37.54  | 91.75   | 93.47            |
| P1-6      | 12.35           | 37.62  | 91.27   | 91.05            |
| P1-7      | 6.56            | 37.77  | 91.84   | 90.72            |
| P1-8      | 8.53            | 37.67  | 91.72   | 90.8             |
| P1-9      | 8.50            | 37.98  | 92.55   | 89.89            |
| P1-10     | 9.14            | 38.09  | 92.57   | 91.05            |
| P1-11     | 7.43            | 37.2   | 91.36   | 89.51            |
| P1-12     | 6.77            | 37.58  | 91.34   | 90.85            |
| P1-13     | 8.69            | 37.55  | 92.38   | 89.95            |
| P1-14     | 6.62            | 37.8   | 91.89   | 89.07            |
| P1-15     | 12.80           | 37.63  | 91      | 90.18            |
| P2-1      | 28.97           | 37.69  | 89.38   | 53.17            |
| P2-2      | 28.26           | 36.73  | 89.79   | 40.2             |
| P3-1      | 15.84           | 37.41  | 86.92   | 89.9             |
| P4-1      | 11.71           | 37.48  | 89.65   | 92.42            |
| P4-2      | 10.89           | 37.64  | 89.22   | 91.31            |
| P4-3      | 8.59            | 37.36  | 89.17   | 92.9             |
| P4-4      | 12.16           | 38.08  | 88.97   | 93.29            |
| P4-5      | 17.31           | 37.75  | 88.26   | 93.02            |
| P4-6      | 10.73           | 37.98  | 87.62   | 91.68            |
| P4-7      | 14.36           | 37.28  | 88.06   | 90.78            |
| P4-8      | 12.58           | 37.55  | 89.41   | 92.06            |
| P4-9      | 9.07            | 37.69  | 89.77   | 92.99            |
| P4-10     | 13.03           | 37.24  | 89.75   | 93.34            |
| P4-11     | 11.61           | 37.14  | 89.78   | 92.89            |
| P4-12     | 14.29           | 37.41  | 88.69   | 91.71            |
| P5-1      | 7.50            | 37.75  | 90.5    | 90.87            |
| P5-2      | 9.20            | 37.37  | 89.28   | 93.02            |
| P5-3      | 10.05           | 37.41  | 88.48   | 90.99            |
| P5-4      | 7.20            | 37.67  | 91.48   | 89.67            |
| P5-5      | 8.40            | 37.8   | 91.01   | 91.3             |
| P5-6      | 11.30           | 37.97  | 89.52   | 90.48            |
| P5-7      | 9.39            | 37.85  | 91.3    | 91.12            |
| P5-8      | 20.14           | 37.8   | 91.03   | 88.06            |
| P5-9      | 13.90           | 37.82  | 89.68   | 89.85            |
| P5-10     | 8.19            | 37.95  | 92.11   | 87.83            |
| P5-11     | 8.22            | 37.8   | 91.41   | 90.76            |

|       |       |       |       |       |
|-------|-------|-------|-------|-------|
| P5-12 | 13.13 | 37.58 | 91.44 | 87.18 |
| P5-13 | 12.65 | 37.37 | 88.9  | 93.15 |
| P5-14 | 11.91 | 37.6  | 91.23 | 89.88 |
| P6-1  | 14.01 | 37.72 | 87.79 | 91.25 |
| P6-2  | 11.67 | 37.59 | 88.96 | 91.69 |
| P6-3  | 9.98  | 37.89 | 89.66 | 93.11 |
| P6-4  | 11.29 | 37.93 | 89.38 | 91.4  |
| P6-5  | 10.20 | 37.47 | 87.72 | 90.36 |
| P6-6  | 11.26 | 37.47 | 88.23 | 91.39 |
| P6-7  | 7.40  | 37.82 | 88    | 91.42 |
| P6-8  | 13.92 | 37.59 | 88.53 | 91.92 |
| P6-9  | 8.70  | 37.81 | 88.13 | 91.51 |
| P6-10 | 9.56  | 37.73 | 89.23 | 92.09 |
| P7-1  | 9.02  | 37.5  | 91.56 | 91.3  |
| P7-2  | 9.61  | 37.93 | 91.92 | 88.62 |
| P7-3  | 9.61  | 37.72 | 92.1  | 89.34 |
| P7-4  | 8.29  | 37.91 | 92.75 | 90.85 |
| P7-5  | 10.38 | 37.5  | 91.88 | 90.67 |
| P7-6  | 6.97  | 37.45 | 92.28 | 90.97 |
| P7-7  | 8.34  | 37.89 | 92.19 | 90.41 |
| P7-8  | 6.61  | 37.49 | 92.5  | 91.1  |
| P7-9  | 6.95  | 37.46 | 92.45 | 90.76 |
| P7-10 | 8.33  | 37.61 | 91.38 | 90.47 |
| P7-11 | 8.17  | 37.84 | 91.12 | 92.12 |
| P7-12 | 7.93  | 37.8  | 91.34 | 91.6  |
| P8-1  | 10.11 | 37.25 | 89.1  | 92.35 |
| P8-2  | 10.82 | 37.45 | 88.13 | 92.37 |
| P8-3  | 9.07  | 37.38 | 88.21 | 91.31 |
| P8-4  | 11.23 | 37.55 | 88.3  | 92.21 |
| P8-5  | 11.29 | 37.39 | 87.38 | 91.31 |
| P8-6  | 15.24 | 37.28 | 87.84 | 91.47 |
| P8-7  | 7.25  | 37.18 | 87.7  | 91.8  |
| P8-8  | 17.26 | 36.91 | 87.88 | 91.84 |
| P8-9  | 12.37 | 36.93 | 87.63 | 91.99 |
| P8-10 | 20.12 | 37.02 | 88.26 | 91.27 |
| P8-11 | 9.49  | 37.51 | 88.28 | 92.13 |
| P8-12 | 17.46 | 37.38 | 87.62 | 90.04 |
| P8-13 | 9.91  | 37.73 | 87.87 | 91.82 |
| P9-1  | 10.13 | 37.41 | 89.14 | 92.48 |
| P9-2  | 11.66 | 37.38 | 88.85 | 92.91 |
| P9-3  | 8.16  | 37.25 | 89.01 | 92.6  |
| P9-4  | 6.59  | 37.38 | 89.29 | 92.84 |
| P9-5  | 32.92 | 36.47 | 89.42 | 36.17 |
| P9-6  | 31.37 | 36.8  | 89.32 | 50.29 |

|       |       |       |       |       |
|-------|-------|-------|-------|-------|
| P9-7  | 8.96  | 37.3  | 89.35 | 92.16 |
| P9-8  | 9.00  | 37.2  | 89.15 | 92.83 |
| P9-9  | 10.81 | 37.37 | 89.34 | 93.42 |
| P9-10 | 8.65  | 37.41 | 89.32 | 90.67 |
| P10-1 | 8.66  | 37.2  | 87.47 | 92.49 |
| P10-2 | 8.44  | 37.62 | 88.52 | 91.31 |
| P10-3 | 6.61  | 37.59 | 88.54 | 91.63 |
| P10-4 | 9.10  | 37.49 | 87.41 | 91.26 |
| P10-5 | 11.81 | 37.2  | 87.17 | 91.96 |
| P10-6 | 8.23  | 37.48 | 88.06 | 92.17 |
| P10-7 | 10.11 | 37.36 | 88.05 | 92.83 |
| P10-8 | 8.13  | 37.34 | 88.06 | 93.16 |

---
